# Supplementary material for: High genetic structure and low mitochondrial diversity in bottlenose dolphins of the Archipelago of Bocas del Toro, Panama: A population at risk?
Source: PLoS One. 2017 Dec 13;12(12):e0189370. doi: 10.1371/journal.pone.0189370 (PMC5728558; doi:10.1371/journal.pone.0189370)
Supplement: S1 Data — (XLSX) [file pone.0189370.s001.xlsx]

## Sheet: Microsat-Data
Sample-ID	Population	Country	D08	D08	D22	D22	MK6	MK6	MK8	MK8	MK9	MK9	TexVet5	TexVet5	Tur48	Tur48	Tur91	Tur91	Tur117	Tur117
BDT1	Bocas del Toro	Panama	103	103	120	124	166	166	96	106	166	166	205	209	310	314	203	203	170	182
BDT3	Bocas del Toro	Panama	103	103	120	124	166	166	104	106	166	170	205	211	314	314	203	203	182	182
BDT5	Bocas del Toro	Panama	103	103	124	126	166	168	96	104	170	170	205	211	310	314	203	203	178	178
BDT6	Bocas del Toro	Panama	103	103	120	124	166	166	96	104	164	170	205	211	314	314	203	203	182	182
BDT7	Bocas del Toro	Panama	103	119	124	126	136	168	96	104	164	164	207	209	314	314	207	207	178	182
BDT8	Bocas del Toro	Panama	103	103	120	126	166	168	104	106	164	164	209	209	314	314	203	203	170	178
BDT9	Bocas del Toro	Panama	103	103	124	124	168	168	96	104	164	164	205	207	314	314	203	203	170	182
BDT10	Bocas del Toro	Panama	103	103	124	126	166	166	96	106	164	170	207	209	314	314	203	203	178	178
BDT12	Bocas del Toro	Panama	103	105	124	126	136	168	96	104	160	164	205	207	314	314	203	219	170	170
BDT13	Bocas del Toro	Panama	103	103	124	126	166	166	96	104	164	170	205	209	310	314	219	219	182	182
BDT14	Bocas del Toro	Panama	103	103	120	130	166	166	104	106	164	170	205	209	314	314	203	219	170	182
BDT17	Bocas del Toro	Panama	101	119	0	0	166	168	104	106	0	0	203	205	314	314	203	219	178	182
BDT18	Bocas del Toro	Panama	103	103	120	124	166	166	104	106	164	164	209	211	314	314	0	0	170	182
BDT19	Bocas del Toro	Panama	103	103	124	126	166	166	104	106	164	164	205	205	314	314	203	219	170	170
BDT20	Bocas del Toro	Panama	103	103	124	124	166	166	104	106	164	170	205	209	314	314	203	219	170	182
BDT21	Bocas del Toro	Panama	103	103	120	124	166	166	104	106	160	164	205	209	314	314	203	219	170	178
BDT22	Bocas del Toro	Panama	101	101	120	124	168	168	104	106	164	170	207	209	314	314	0	0	170	182
BDT23	Bocas del Toro	Panama	103	103	124	130	166	166	104	106	164	164	209	211	314	314	203	219	170	182
BDT24	Bocas del Toro	Panama	103	103	124	126	0	0	104	106	164	164	205	209	314	314	215	219	170	178
BDT25	Bocas del Toro	Panama	103	103	124	124	166	166	104	106	164	170	205	209	314	314	203	203	182	182
BDT29	Bocas del Toro	Panama	103	103	126	126	166	166	92	92	164	170	209	211	314	314	203	207	178	178
BDT30	Bocas del Toro	Panama	103	103	120	120	166	166	106	106	160	164	205	209	314	314	207	219	170	182
BDT31	Bocas del Toro	Panama	103	103	120	130	166	166	92	92	164	170	207	209	314	314	203	219	182	182
BDT32	Bocas del Toro	Panama	103	103	124	130	166	170	92	92	164	170	207	209	314	314	203	219	178	182
BDT33	Bocas del Toro	Panama	103	119	124	128	166	166	92	92	164	170	205	205	314	314	203	203	182	182
CR15	Gandoca-Manzanillo	Costa Rica	103	103	0	0	166	166	0	0	0	0	0	0	0	0	0	0	0	0
CR16	Gandoca-Manzanillo	Costa Rica	103	103	124	124	166	166	102	106	164	164	0	0	310	310	203	211	182	182
CR26	Gandoca-Manzanillo	Costa Rica	101	103	122	122	0	0	90	90	162	178	0	0	314	314	203	207	170	182
CR27	Gandoca-Manzanillo	Costa Rica	101	103	0	0	150	162	90	90	162	178	207	207	0	0	203	219	170	170
CR28	Gandoca-Manzanillo	Costa Rica	101	103	0	0	162	162	90	90	0	0	203	205	314	314	207	207	170	170
